# Supplementary material
Source: PubMed Central journal article supplement (PMC4933180)
Supplement: 10.1074_M116.716704_jbc.M116.716704-1.pdf [file 10.1074_M116.716704_jbc.M116.716704-1.pdf]

## Lahiri et al, Supplementary Figure 1(related to Figure 2)

## W-Beijing

## A. Down in mutants (52)

Fold decrease

| Mass       | RT ( min) | Carbon | Fatty Acyl | Name        | S531L | Q513E | H526Y |
|------------|-----------|--------|------------|-------------|-------|-------|-------|
| 298.34567  | 27.1      |        |            | unannotated | 10.2  | 9.3   | 4.6   |
| 301.14993  | 7.0       |        |            | unannotated | 2.6   | 2.3   | 2.2   |
| 329.23033  | 7.0       |        |            | unannotated | 4.0   | 2.2   | 2.1   |
| 372.15093  | 23.2      |        |            | unannotated | 4.1   | 2.3   | 6.8   |
| 409.16339  | 6.5       |        |            | unannotated | 4.2   | 7.4   | 2.0   |
| 435.24937  | 4.3       |        |            | unannotated | 3.1   | 2.4   | 3.6   |
| 463.42678  | 15.8      |        |            | unannotated | 2.2   | 2.3   | 2.1   |
| 493.28997  | 20.9      |        |            | unannotated | 2.5   | 5.0   | 2.4   |
| 511.30502  | 21.0      |        |            | unannotated | 2.1   | 2.4   | 2.0   |
| 516.38920  | 6.4       |        |            | unannotated | 2.2   | 4.6   | 2.6   |
| 555.21618  | 4.5       |        |            | unannotated | 2.0   | 4.5   | 4.1   |
| 560.41600  | 5.5       |        |            | unannotated | 2.5   | 4.7   | 2.0   |
| 577.34540  | 4.5       |        |            | unannotated | 2.8   | 2.2   | 5.5   |
| 582.36648  | 21.4      |        |            | unannotated | 3.2   | 4.3   | 6.6   |
| 596.38193  | 19.8      |        |            | unannotated | 2.0   | 2.3   | 2.1   |
| 602.34816  | 4.5       |        |            | unannotated | 2.6   | 2.1   | 24.3  |
| 619.27632  | 4.3       |        |            | unannotated | 4.7   | 4.2   | 2.3   |
| 624.37701  | 22.0      |        |            | unannotated | 2.9   | 2.0   | 2.3   |
| 630.36853  | 4.5       |        |            | unannotated | 2.0   | 2.1   | 2.0   |
| 634.45307  | 8.6       |        |            | unannotated | 2.2   | 3.6   | 16.0  |
| 644.47872  | 4.5       |        |            | unannotated | 2.8   | 3.5   | 5.2   |
| 713.51153  | 6.3       |        |            | unannotated | 2.4   | 3.2   | 2.2   |
| 738.52875  | 23.2      |        |            | unannotated | 4.3   | 2.2   | 2.5   |
| 749.52993  | 8.2       |        |            | unannotated | 3.9   | 2.6   | 2.7   |
| 775.20655  | 24.8      |        |            | unannotated | 3.3   | 3.8   | 4.8   |
| 785.25630  | 10.2      | 35     | (8:1)      |             | 1     | 8.6   | 4.3   |
| 799.27200  | 10.2      | 36     | (9:1)      |             | 1     | 6.7   | 3.8   |
| 815.30243  | 8.6       | 37     | (10:0)     |             | 1     | 3.0   | 2.9   |
| 841.32422  | 8.6       | 39     | (12:1)     |             | 1     | 4.9   | 3.1   |
| 846.44531  | 6.4       |        |            | unannotated | 2.1   | 3.7   | 3.0   |
| 909.45943  | 5.9       | 46     | (19:1)     |             | 2     | 4.7   | 3.1   |
| 911.47224  | 6.1       | 46     | (19:0)     |             | 2     | 2.7   | 2.6   |
| 1071.47042 | 4.9       |        |            | unannotated | 3.1   | 2.6   | 5.5   |
| 1090.91134 | 20.5      |        |            | unannotated | 2.5   | 2.3   | 6.2   |
| 1120.96076 | 23.7      |        |            | unannotated | 3.2   | 2.8   | 2.6   |
| 1127.53497 | 4.5       |        |            | unannotated | 2.1   | 2.4   | 6.0   |
| 1167.77527 | 6.1       |        |            | unannotated | 2.6   | 3.4   | 2.4   |
| 1296.96320 | 20.9      | 70     | (58:0)     |             | 3     | 3.3   | 2.5   |
| 1339.91504 | 22.9      |        |            | unannotated | 2.3   | 2.4   | 2.5   |
| 1364.02857 | 20.4      | 76     | (65:0)     |             | 3     | 2.2   | 2.4   |
| 1381.06021 | 20.4      | 76     | (64:0)     |             | 3     | 2.0   | 2.1   |
| 1395.05993 | 20.4      | 77     | (64:0)     |             | 3     | 2.5   | 2.1   |
| 1409.09730 | 22.5      |        |            | unannotated | 2.0   | 2.2   | 2.7   |
| 1496.16473 | 22.5      | 82     | (70:0)     |             | 3     | 2.5   | 2.0   |
| 1520.12015 | 19.3      |        |            | unannotated | 2.2   | 2.0   | 3.3   |
| 1583.76361 | 20.1      |        |            | unannotated | 2.3   | 2.1   | 2.2   |
| 1652.49423 | 4.5       |        |            | unannotated | 2.7   | 2.2   | 4.8   |
| 1666.51008 | 4.5       |        |            | unannotated | 3.3   | 2.1   | 3.5   |
| 1680.52883 | 4.5       |        |            | unannotated | 2.9   | 2.0   | 2.8   |
| 1694.53922 | 4.5       |        |            | unannotated | 2.6   | 2.0   | 4.0   |
| 1929.38135 | 6.9       |        |            | unannotated | 2.4   | 2.0   | 2.3   |

Lahiri et al, Supplementary Figure 1(related to Figure 2)

**B. Up in mutants (120)**

fold increase

| Mass      | RT ( min) | Name        | S531L | Q513E | H526Y |
|-----------|-----------|-------------|-------|-------|-------|
| 306.10101 | 18.5      | unannotated | 7.2   | 10.6  | 7.6   |
| 315.12432 | 4.3       | unannotated | 2.7   | 2.3   | 2.3   |
| 325.27763 | 7.5       | unannotated | 2.0   | 2.2   | 2.0   |
| 372.20593 | 26.4      | unannotated | 2.1   | 2.4   | 2.3   |
| 391.03823 | 36.0      | unannotated | 2.0   | 2.0   | 2.1   |
| 413.26715 | 38.5      | unannotated | 2.2   | 8.1   | 2.6   |
| 437.26213 | 19.2      | unannotated | 6.9   | 7.4   | 3.5   |
| 459.24530 | 5.5       | unannotated | 2.4   | 2.1   | 2.2   |
| 464.37310 | 4.5       | unannotated | 2.0   | 2.6   | 2.1   |
| 470.24620 | 26.4      | unannotated | 2.5   | 2.5   | 2.2   |
| 474.30517 | 4.3       | unannotated | 3.7   | 6.7   | 6.0   |
| 482.37156 | 5.4       | unannotated | 6.1   | 6.5   | 3.0   |
| 488.32340 | 4.3       | unannotated | 6.0   | 2.6   | 3.2   |
| 508.36300 | 26.4      | unannotated | 2.1   | 4.2   | 2.8   |
| 514.35845 | 7.1       | unannotated | 2.4   | 5.8   | 2.0   |
| 538.37455 | 28.0      | unannotated | 2.2   | 2.9   | 2.4   |
| 554.42522 | 6.2       | unannotated | 4.1   | 2.2   | 2.3   |
| 564.35930 | 27.2      | unannotated | 2.4   | 5.3   | 3.2   |
| 570.42250 | 6.3       | unannotated | 2.4   | 5.1   | 2.9   |
| 575.37928 | 6.3       | unannotated | 4.9   | 5.2   | 3.3   |
| 577.51923 | 12.5      | unannotated | 4.8   | 2.2   | 2.7   |
| 584.52482 | 3.7       | unannotated | 2.1   | 4.9   | 3.7   |
| 593.50530 | 4.0       | unannotated | 4.8   | 2.0   | 2.4   |
| 607.53100 | 5.9       | unannotated | 2.0   | 2.1   | 2.4   |
| 608.38666 | 27.2      | unannotated | 2.3   | 2.0   | 2.0   |
| 621.58201 | 25.0      | unannotated | 2.7   | 4.5   | 2.0   |
| 632.51423 | 4.5       | unannotated | 2.0   | 4.4   | 2.3   |
| 641.53659 | 6.5       | unannotated | 4.4   | 4.2   | 2.1   |
| 657.53212 | 6.5       | unannotated | 4.3   | 4.3   | 2.8   |
| 681.52500 | 6.3       | unannotated | 4.1   | 3.3   | 2.5   |
| 686.50700 | 8.0       | unannotated | 2.6   | 4.1   | 2.7   |
| 697.48120 | 5.5       | unannotated | 2.1   | 4.0   | 2.3   |
| 697.52916 | 6.5       | unannotated | 2.0   | 4.0   | 2.6   |
| 702.49885 | 10.8      | unannotated | 2.2   | 3.5   | 2.5   |
| 708.55258 | 9.7       | unannotated | 3.0   | 3.2   | 2.8   |
| 747.52223 | 21.5      | unannotated | 2.5   | 2.3   | 2.2   |

Lahiri et al, Supplementary Figure 1(related to Figure 2)

| Mass       | RT ( min) | Name        | S531L | Q513E | H526Y |
|------------|-----------|-------------|-------|-------|-------|
| 774.55400  | 4.3       | unannotated | 2.6   | 3.4   | 2.5   |
| 822.75440  | 3.3       | unannotated | 2.7   | 2.1   | 3.4   |
| 825.55135  | 23.5      | unannotated | 2.3   | 3.3   | 2.1   |
| 828.60810  | 5.8       | unannotated | 3.3   | 3.2   | 2.6   |
| 837.55123  | 23.5      | unannotated | 2.8   | 3.1   | 2.4   |
| 842.57625  | 24.0      | unannotated | 3.2   | 3     | 2.1   |
| 850.54846  | 24.5      | unannotated | 3.2   | 3.1   | 2.4   |
| 853.58213  | 23.2      | unannotated | 3.1   | 3     | 2.4   |
| 856.58809  | 23.2      | unannotated | 2.2   | 2.4   | 2.1   |
| 860.69223  | 22.5      | unannotated | 2.1   | 2     | 2.6   |
| 864.79974  | 3.3       | unannotated | 2.0   | 2.2   | 2.4   |
| 868.59286  | 26.0      | unannotated | 2.2   | 2     | 2.0   |
| 892.83373  | 3.3       | unannotated | 2.3   | 2.1   | 2.2   |
| 895.58800  | 6.3       | unannotated | 3.2   | 2.3   | 2.0   |
| 898.63734  | 25.0      | unannotated | 2.8   | 2     | 2.3   |
| 900.62604  | 5.0       | unannotated | 3.4   | 2.9   | 4.6   |
| 905.59630  | 5.0       | unannotated | 2.4   | 2.3   | 2.6   |
| 909.14653  | 30.1      | unannotated | 2.2   | 2.0   | 2.0   |
| 911.58523  | 6.3       | unannotated | 2.1   | 2.1   | 2.4   |
| 916.62800  | 5.0       | unannotated | 3.0   | 2.9   | 2.3   |
| 919.59410  | 5.0       | unannotated | 2.4   | 2.5   | 2.2   |
| 921.59200  | 5.0       | unannotated | 2.3   | 2.4   | 2.3   |
| 934.64114  | 4.1       | unannotated | 2.2   | 2.9   | 3.0   |
| 950.63667  | 4.1       | unannotated | 2.5   | 2.3   | 2.7   |
| 958.68710  | 22.5      | unannotated | 2.3   | 2.0   | 2.4   |
| 967.65201  | 22.0      | unannotated | 2.1   | 2.7   | 2.9   |
| 970.65723  | 27.0      | unannotated | 2.3   | 2.2   | 2.0   |
| 974.64200  | 21.5      | unannotated | 2.3   | 2.2   | 2.0   |
| 984.67623  | 26.0      | unannotated | 2.4   | 2.0   | 2.7   |
| 990.68130  | 24.3      | unannotated | 3.1   | 2.1   | 2.3   |
| 990.94334  | 3.5       | unannotated | 3.3   | 2.4   | 2.8   |
| 993.66591  | 4.1       | unannotated | 3.0   | 2.7   | 2.3   |
| 1000.78005 | 4.1       | unannotated | 2.2   | 2.3   | 2.0   |
| 1078.57112 | 4.1       | unannotated | 2.1   | 2.2   | 2.2   |
| 1092.59798 | 4.1       | unannotated | 2.4   | 2.5   | 2.2   |
| 1106.61107 | 4.1       | unannotated | 2.2   | 2.2   | 2.0   |
| 1138.77327 | 4.1       | unannotated | 2.1   | 2.1   | 2.0   |
| 1170.75345 | 4.1       | unannotated | 2.3   | 2.1   | 2.2   |
| 1199.14851 | 3.3       | unannotated | 3.2   | 2.5   | 2.4   |
| 1211.15322 | 3.3       | unannotated | 2.0   | 2.5   | 3.8   |
| 1217.68237 | 26.0      | unannotated | 2.9   | 2.6   | 2.1   |
| 1225.17280 | 3.3       | unannotated | 2.6   | 2.4   | 3.7   |

Lahiri et al, Supplementary Figure 1(related to Figure 2)

| Mass        | RT ( min) | Name        | S531L | Q513E | H526Y |
|-------------|-----------|-------------|-------|-------|-------|
| 1253.86500  | 26.0      | unannotated | 3.1   | 2.4   | 2.3   |
| 1270.89129  | 22.0      | unannotated | 2.6   | 2.3   | 2.2   |
| 1298.92876  | 22.5      | unannotated | 3.1   | 2.3   | 2.3   |
| 1303.88251  | 19.3      | unannotated | 3.5   | 2.0   | 2.9   |
| 1347.92398  | 20.5      | unannotated | 2.8   | 2.3   | 2.2   |
| 1349.94324  | 24.0      | unannotated | 2.0   | 2.2   | 2.3   |
| 1351.953450 | 24.0      | unannotated | 2.1   | 2.0   | 2.3   |
| 1377.981060 | 20.8      | unannotated | 2.1   | 2.3   | 2.9   |
| 1384.037120 | 23.0      | unannotated | 2.7   | 2.0   | 2.1   |
| 1392.992190 | 20.2      | unannotated | 2.1   | 2.0   | 2.3   |
| 1395.012870 | 20.1      | unannotated | 2.7   | 2.3   | 2.3   |
| 1420.491890 | 24.0      | unannotated | 2.9   | 2.0   | 2.4   |
| 1423.813650 | 24.0      | unannotated | 2.2   | 2.2   | 2.4   |
| 1424.029800 | 20.6      | unannotated | 2.0   | 2.2   | 2.3   |
| 1451.283560 | 6.0       | unannotated | 2.0   | 2.2   | 8.9   |
| 1454.061250 | 13.0      | unannotated | 2.8   | 2.1   | 3.6   |
| 1498.060230 | 21.5      | unannotated | 2.6   | 2.0   | 2.4   |
| 1520.041030 | 12.5      | unannotated | 2.4   | 2.0   | 7.0   |
| 1573.122030 | 23.0      | unannotated | 2.5   | 2.1   | 2.5   |
| 1587.141450 | 8.9       | unannotated | 2.3   | 2.2   | 6.2   |
| 1602.115420 | 14.0      | unannotated | 2.3   | 2.1   | 2.4   |
| 1690.119100 | 24.3      | unannotated | 2.1   | 2.8   | 4.9   |
| 1707.161260 | 23.5      | unannotated | 2.0   | 2.1   | 3.8   |
| 2074.931330 | 23.2      | unannotated | 2.1   | 2.1   | 4.3   |
| 2140.890910 | 25.0      | unannotated | 2.2   | 2.2   | 2.3   |
| 2150.461000 | 23.2      | unannotated | 2.1   | 3.7   | 9.2   |
| 2188.684500 | 22.5      | unannotated | 2.0   | 2.2   | 2.0   |
| 2269.492900 | 24.0      | unannotated | 2.2   | 3.2   | 2.0   |
| 2286.522560 | 24.0      | unannotated | 2.1   | 2.2   | 2.2   |
| 2314.544320 | 25.3      | unannotated | 2.0   | 3.2   | 2.4   |
| 2510.382500 | 22.8      | unannotated | 2.0   | 2.1   | 2.5   |
| 2522.384210 | 22.5      | unannotated | 2.1   | 2.1   | 2.3   |
| 2559.730120 | 23.4      | unannotated | 2.3   | 2.1   | 5.7   |
| 2568.731340 | 23.2      | unannotated | 2.2   | 2.1   | 2.3   |
| 2569.225600 | 23.5      | unannotated | 2.0   | 3.5   | 8.0   |
| 2570.720890 | 23.5      | unannotated | 2.1   | 2.0   | 3.7   |
| 2576.753670 | 23.3      | unannotated | 2.0   | 3.1   | 5.5   |
| 2581.734790 | 23.3      | unannotated | 2.0   | 2.1   | 6.6   |
| 2780.962560 | 20.0      | unannotated | 2.0   | 2.0   | 2.1   |
| 2798.998900 | 20.0      | unannotated | 2.2   | 2.0   | 2.1   |
| 2801.991340 | 20.5      | unannotated | 2.0   | 2.3   | 2.1   |
| 2803.475460 | 20.5      | unannotated | 2.1   | 2.0   | 2.1   |

Lahiri et al, Supplementary figure 2 (related to Figure 2)

| A. CDC1551 – down in mutants (38) |           |        |            |             | Fold decrease |       |       |
|-----------------------------------|-----------|--------|------------|-------------|---------------|-------|-------|
| Mass                              | RT ( min) | Carbon | Fatty Acyl | Name        | S531L         | Q513E | H526Y |
| 485.354520                        | 5.2       |        |            | unannotated | 2.4           | 2.8   | 2.3   |
| 711.355890                        | 6.1       |        |            | unannotated | 3.0           | 4.6   | 2.2   |
| 773.261130                        | 8.7       | 34     | (7:0)      | 1           | 3.6           | 32.3  | 16.0  |
| 785.262250                        | 7.1       | 35     | (8:1)      | 1           | 4.1           | 19.8  | 19.6  |
| 797.293330                        | 7.1       |        |            | unannotated | 3.5           | 6.7   | 8.2   |
| 799.281740                        | 8.1       | 36     | (9:1)      | 1           | 3.7           | 23.3  | 20.1  |
| 801.292830                        | 6.2       | 36     | (9:0)      | 1           | 2.9           | 14.6  | 11.2  |
| 815.308910                        | 6.9       | 37     | (10:0)     | 1           | 5.2           | 16.8  | 12.4  |
| 827.308830                        | 7.1       | 38     | (11:1)     | 1           | 9.1           | 26.3  | 32.4  |
| 829.323730                        | 7.0       | 38     | (11:0)     | 1           | 8.2           | 30.4  | 35.0  |
| 841.320740                        | 6.9       | 39     | (12:1)     | 1           | 10.6          | 22.2  | 13.5  |
| 845.315670                        | 8.7       |        |            | unannotated | 3.9           | 2.9   | 7.9   |
| 857.316450                        | 8.7       |        |            | unannotated | 5.1           | 3.3   | 2.6   |
| 859.332200                        | 8.1       |        |            | unannotated | 4.5           | 6.1   | 9.2   |
| 861.502500                        | 3.8       |        |            | unannotated | 15.0          | 2.3   | 2.6   |
| 871.332810                        | 7.8       |        |            | unannotated | 4.4           | 4.0   | 7.6   |
| 881.317750                        | 7.8       |        |            | unannotated | 3.5           | 3.6   | 8.2   |
| 890.720910                        | 21.3      |        |            | unannotated | 2.5           | 6.2   | 5.2   |
| 909.457660                        | 5.5       | 46     | (19:1)     | 2           | 12.2          | 5.8   | 8.7   |
| 911.471600                        | 5.5       | 46     | (19:0)     | 2           | 9.1           | 6.4   | 8.8   |
| 916.737310                        | 22.0      |        |            | unannotated | 2.4           | 2.3   | 2.3   |
| 944.761370                        | 22.0      |        |            | unannotated | 2.0           | 2.9   | 2.5   |
| 996.386450                        | 6.7       |        |            | unannotated | 2.0           | 2.2   | 2.3   |
| 1029.439430                       | 6.5       |        |            | unannotated | 2.7           | 2.8   | 2.3   |
| 1098.938820                       | 20.0      |        |            | unannotated | 2.3           | 4.3   | 3.0   |
| 1124.951830                       | 20.9      |        |            | unannotated | 2.4           | 4.3   | 3.9   |
| 1140.984270                       | 20.6      |        |            | unannotated | 2.2           | 2.1   | 2.0   |
| 1152.980120                       | 20.6      |        |            | unannotated | 2.4           | 3.7   | 2.9   |
| 1205.709450                       | 7.1       |        |            | unannotated | 2.1           | 2.3   | 2.6   |
| 1558.164230                       | 18.4      |        |            | unannotated | 2.2           | 2.4   | 2.0   |
| 1564.418850                       | 3.9       |        |            | unannotated | 2.6           | 9.7   | 15.8  |
| 1679.532700                       | 3.9       |        |            | unannotated | 2.9           | 2.0   | 3.3   |
| 1694.559210                       | 3.9       |        |            | unannotated | 3.1           | 2.6   | 4.4   |
| 1857.478360                       | 16.9      |        |            | unannotated | 2.2           | 3.1   | 2.5   |
| 1896.513640                       | 17.1      |        |            | unannotated | 2.0           | 2.1   | 2.0   |
| 1900.531290                       | 16.9      |        |            | unannotated | 2.8           | 8.2   | 4.5   |
| 2740.904430                       | 20.1      |        |            | unannotated | 2.1           | 2.1   | 2.0   |
| 2745.932400                       | 20.1      |        |            | unannotated | 2.3           | 2.2   | 2.1   |

Lahiri et al, Supplementary figure 2 (related to Figure 2)

| <b>B. CDC1551- Up in mutants (64)</b> |                  |             |                      |              |              |
|---------------------------------------|------------------|-------------|----------------------|--------------|--------------|
|                                       |                  |             | <b>fold increase</b> |              |              |
| <b>Mass</b>                           | <b>RT ( min)</b> | <b>Name</b> | <b>S531L</b>         | <b>Q513E</b> | <b>H526Y</b> |
| 283.218150                            | 22.2             | unannotated | 2.1                  | 13.5         | 19.8         |
| 304.046340                            | 5.2              | unannotated | 2.3                  | 12.2         | 15.4         |
| 318.280340                            | 5.2              | unannotated | 2.7                  | 9.5          | 16.2         |
| 380.078120                            | 5.2              | unannotated | 2.2                  | 8.8          | 22.3         |
| 394.322480                            | 6.4              | unannotated | 2.7                  | 6.2          | 11.9         |
| 399.149550                            | 6.4              | unannotated | 2.1                  | 2.7          | 2.9          |
| 410.083340                            | 6.4              | unannotated | 2.3                  | 7.4          | 15.7         |
| 414.183400                            | 6.4              | unannotated | 2.2                  | 7.8          | 2.7          |
| 415.255510                            | 22.2             | unannotated | 2.2                  | 4.8          | 16.6         |
| 432.283830                            | 22.2             | unannotated | 2.0                  | 11.2         | 14.7         |
| 440.091120                            | 6.4              | unannotated | 2.1                  | 5.1          | 18.3         |
| 448.254670                            | 5.4              | unannotated | 2.8                  | 2.7          | 5.5          |
| 453.336890                            | 6.4              | unannotated | 2.5                  | 6.7          | 11.5         |
| 460.209540                            | 6.4              | unannotated | 2.3                  | 3.8          | 4.8          |
| 462.072740                            | 6.4              | unannotated | 2.5                  | 2.6          | 8.8          |
| 467.178400                            | 6.4              | unannotated | 2.4                  | 2.9          | 12.8         |
| 467.302810                            | 28.0             | unannotated | 2.7                  | 7.3          | 16.5         |
| 470.106670                            | 7.5              | unannotated | 2.3                  | 12.8         | 20.1         |
| 470.362100                            | 6.4              | unannotated | 2.5                  | 2.0          | 2.1          |
| 475.205640                            | 5.2              | unannotated | 2.1                  | 13.6         | 2.4          |
| 475.318910                            | 6.4              | unannotated | 2.3                  | 4.6          | 12.3         |
| 476.302850                            | 23.5             | unannotated | 2.8                  | 9.3          | 13.9         |
| 478.252610                            | 6.4              | unannotated | 2.6                  | 2.4          | 12.5         |
| 481.266430                            | 23.5             | unannotated | 2.3                  | 8.3          | 7.2          |
| 482.370550                            | 5.2              | unannotated | 2.8                  | 10.0         | 17.2         |
| 489.318100                            | 28.0             | unannotated | 2.6                  | 17.3         | 17.4         |
| 498.381520                            | 5.4              | unannotated | 2.2                  | 3.2          | 5.3          |
| 507.330410                            | 5.2              | unannotated | 2.7                  | 4.6          | 3.0          |
| 509.194800                            | 7.5              | unannotated | 2.3                  | 8.2          | 4.5          |
| 511.331320                            | 28.0             | unannotated | 2.5                  | 4.7          | 19.8         |
| 516.127410                            | 7.5              | unannotated | 2.3                  | 11.2         | 17.6         |
| 526.394190                            | 5.4              | unannotated | 2.9                  | 9.9          | 15.2         |
| 530.350660                            | 7.5              | unannotated | 2.2                  | 2.0          | 2.8          |
| 531.356530                            | 5.2              | unannotated | 2.2                  | 2.7          | 13.0         |
| 533.346700                            | 28.0             | unannotated | 2.7                  | 8.5          | 22.3         |
| 546.138230                            | 7.5              | unannotated | 2.5                  | 6.6          | 2.4          |
| 557.120250                            | 7.5              | unannotated | 2.3                  | 2.8          | 2.7          |
| 570.421550                            | 5.7              | unannotated | 2.6                  | 2.4          | 4.4          |

Lahiri et al, Supplementary figure 2 (related to Figure 2)

| <b>Mass</b> | <b>RT (min)</b> | <b>Name</b> | <b>Fold increase</b> |      |      |
|-------------|-----------------|-------------|----------------------|------|------|
| 575.374630  | 5.7             | unannotated | 2.3                  | 2.0  | 2.0  |
| 576.148420  | 7.5             | unannotated | 2.6                  | 2.8  | 8.9  |
| 583.372560  | 13.0            | unannotated | 2.4                  | 2.4  | 2.3  |
| 598.450310  | 5.7             | unannotated | 3.1                  | 2.2  | 2.0  |
| 646.437320  | 13.0            | unannotated | 2.1                  | 2.5  | 2.2  |
| 658.471920  | 7.5             | unannotated | 2.9                  | 8.6  | 15.7 |
| 730.530340  | 7.5             | unannotated | 2.6                  | 2.5  | 2.2  |
| 732.484440  | 5.4             | unannotated | 2.2                  | 3.5  | 2.7  |
| 734.536630  | 7.5             | unannotated | 2.3                  | 2.0  | 2.1  |
| 740.549270  | 6.4             | unannotated | 2.2                  | 3.7  | 13.9 |
| 746.533950  | 13.0            | unannotated | 2.4                  | 7.1  | 12.8 |
| 758.560410  | 7.5             | unannotated | 2.7                  | 12.0 | 2.8  |
| 784.576130  | 7.5             | unannotated | 2.2                  | 2.4  | 2.0  |
| 787.544630  | 6.2             | unannotated | 2.5                  | 2.6  | 2.4  |
| 804.586450  | 13.0            | unannotated | 2.8                  | 2.4  | 2.8  |
| 839.602900  | 6.4             | unannotated | 2.7                  | 2.0  | 2.3  |
| 942.423220  | 6.4             | unannotated | 2.3                  | 2.8  | 2.1  |
| 948.888230  | 38.2            | unannotated | 2.0                  | 9.7  | 2.1  |
| 959.711850  | 7.5             | unannotated | 2.9                  | 2.5  | 2.3  |
| 1505.109210 | 20.3            | unannotated | 3.1                  | 2.8  | 2.3  |
| 1539.029230 | 20.3            | unannotated | 2.3                  | 2.2  | 2.0  |
| 1564.116410 | 20.3            | unannotated | 2.6                  | 2.8  | 3.3  |
| 1566.113530 | 20.3            | unannotated | 2.2                  | 2.1  | 2.1  |
| 1593.126760 | 5.9             | unannotated | 2.0                  | 2.4  | 2.3  |
| 1625.187330 | 16.1            | unannotated | 3.3                  | 2.5  | 2.2  |
| 2919.712400 | 21.8            | unannotated | 2.1                  | 2    | 2.7  |

**A**

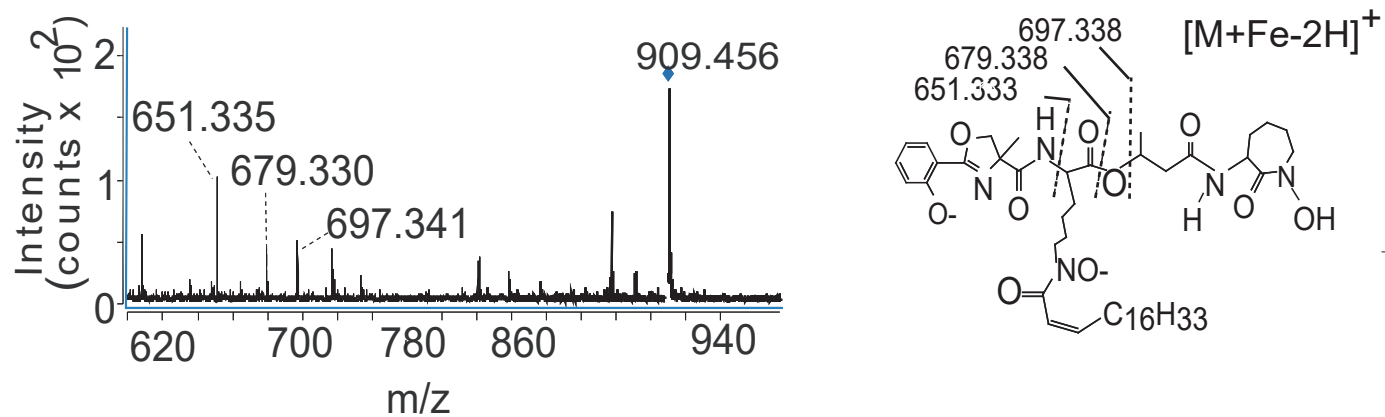

**B**

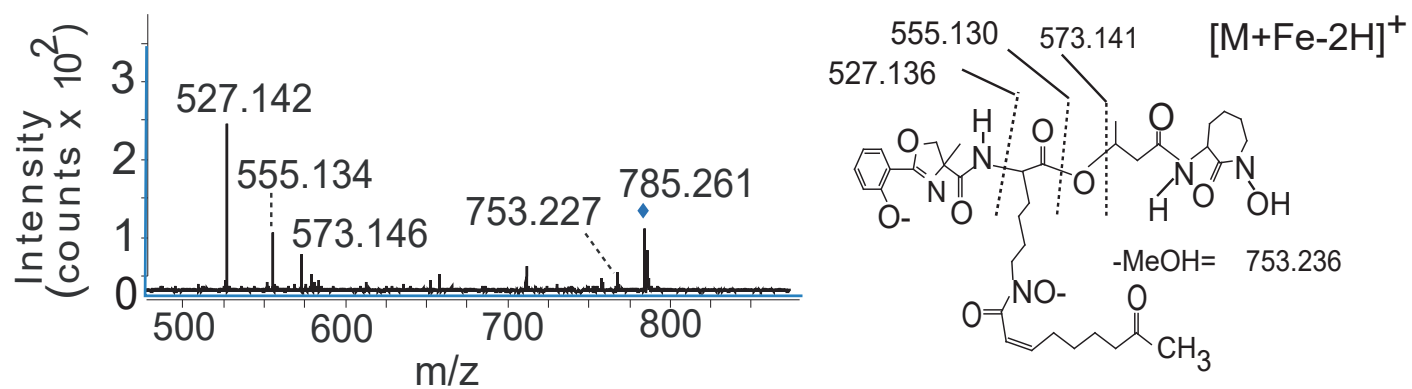

**C**

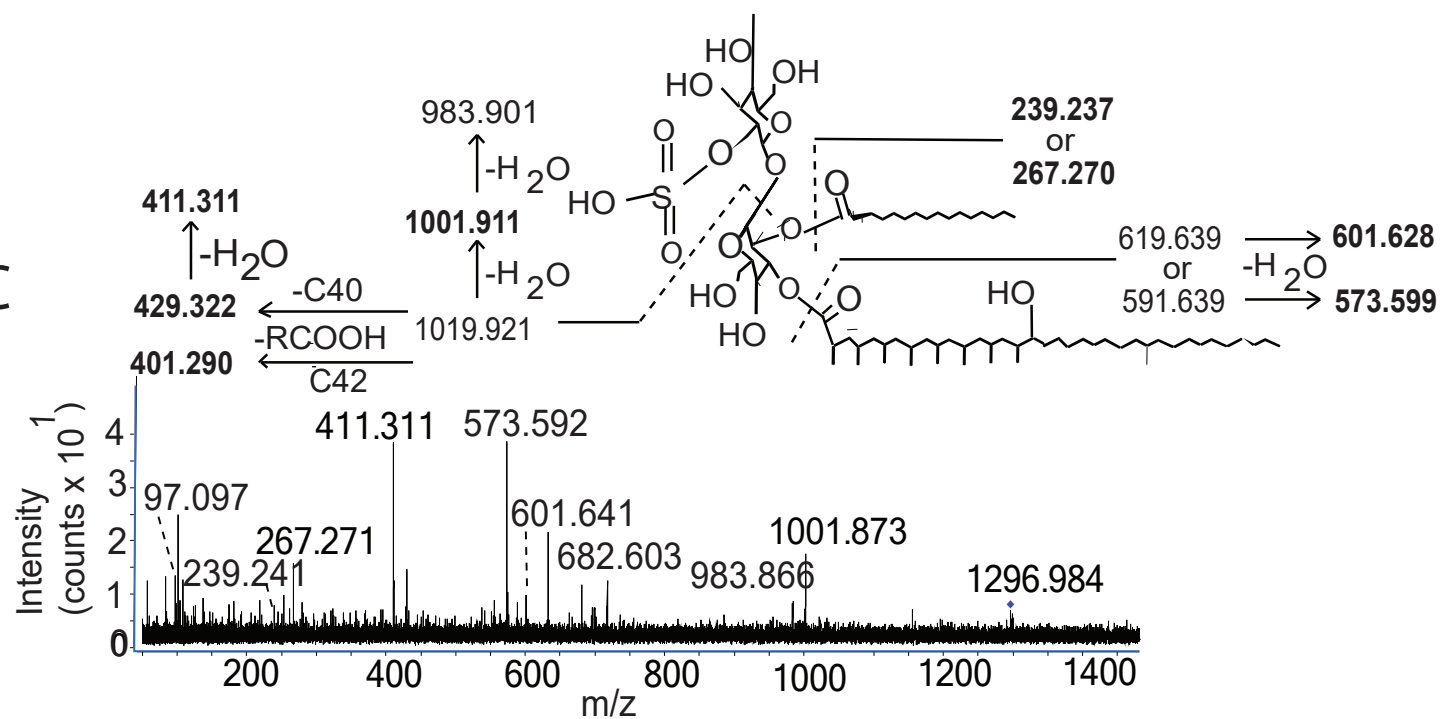



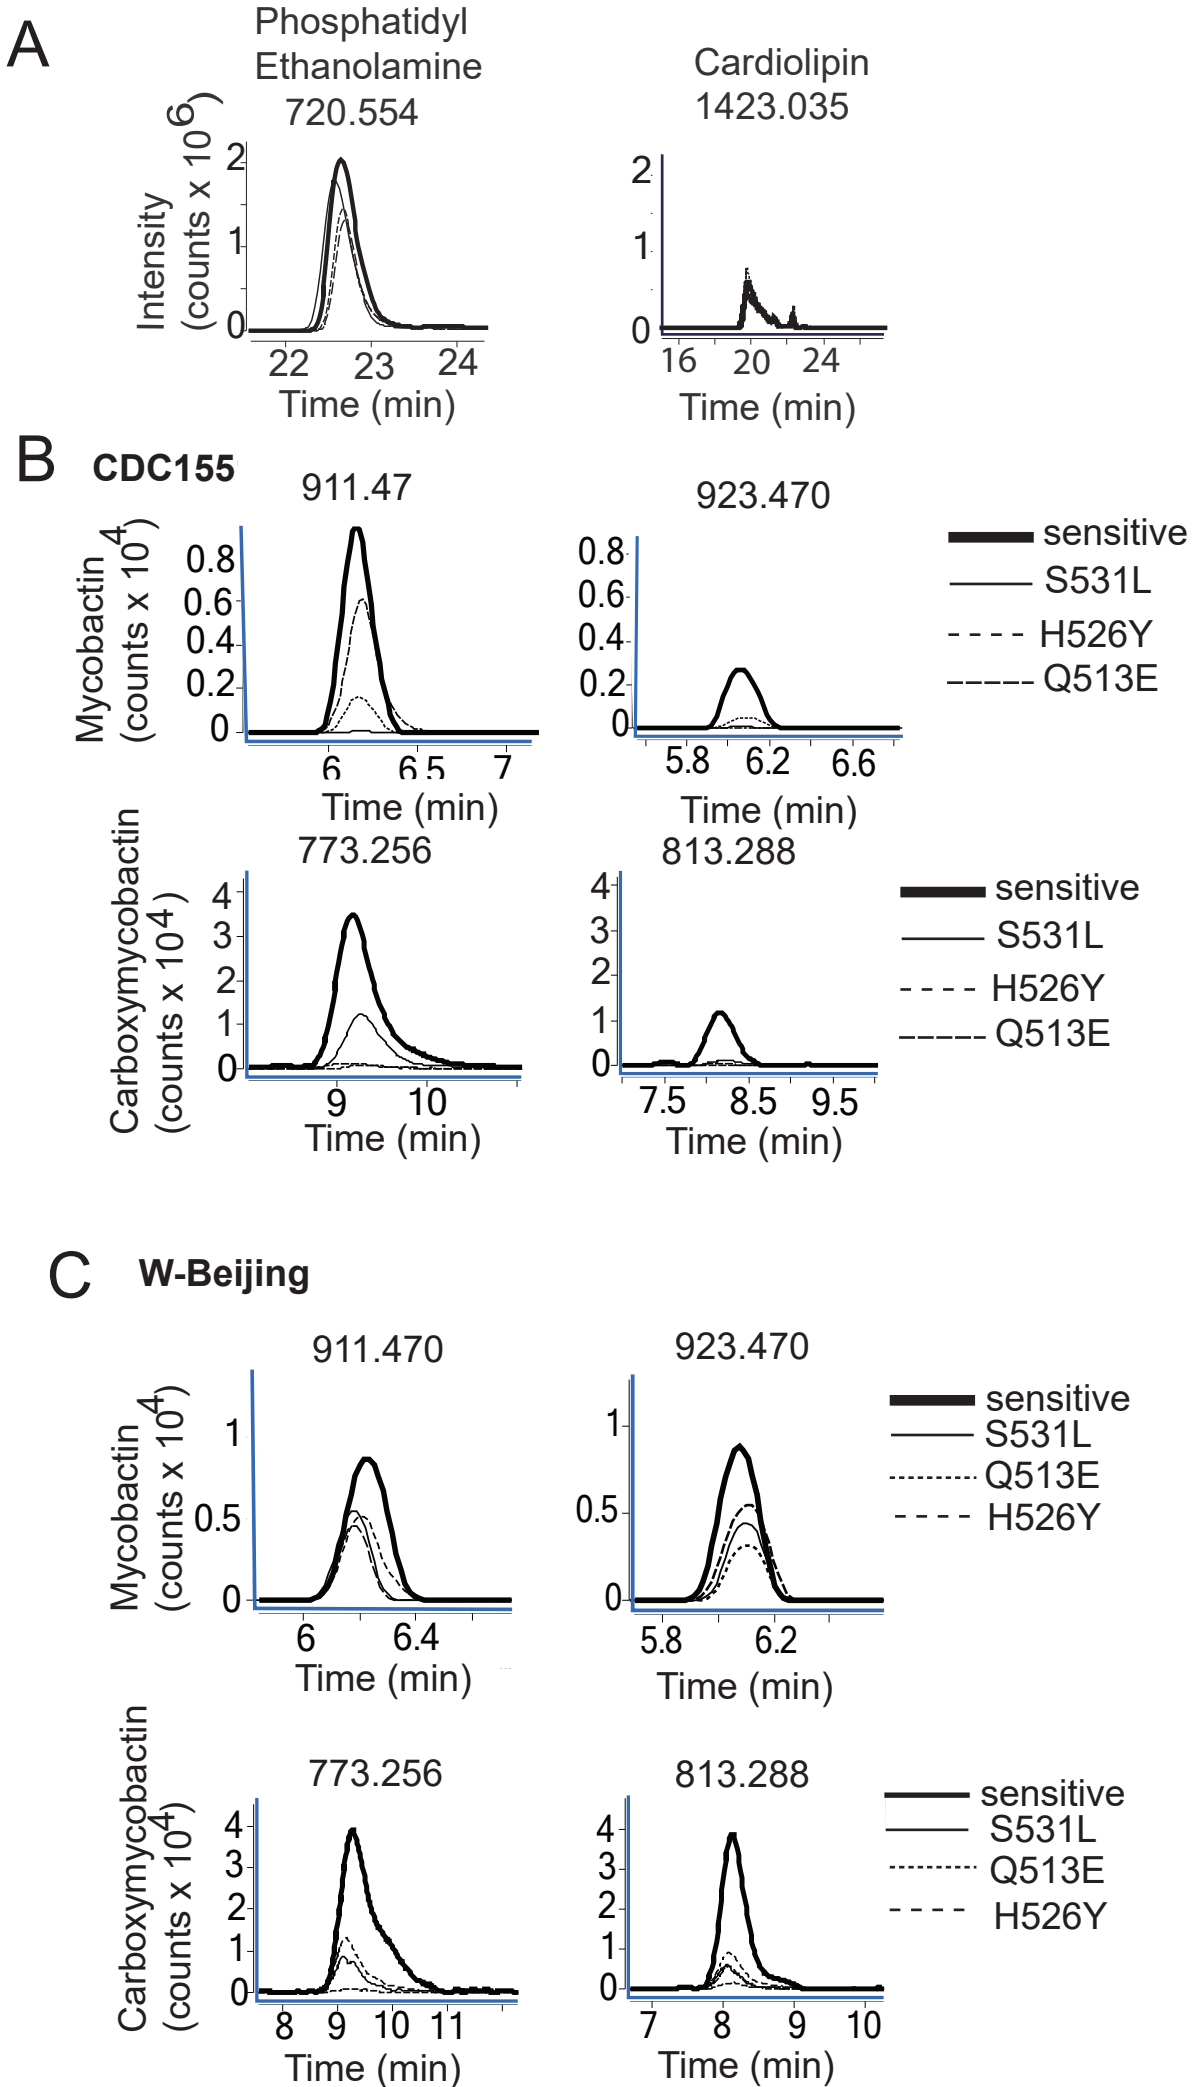

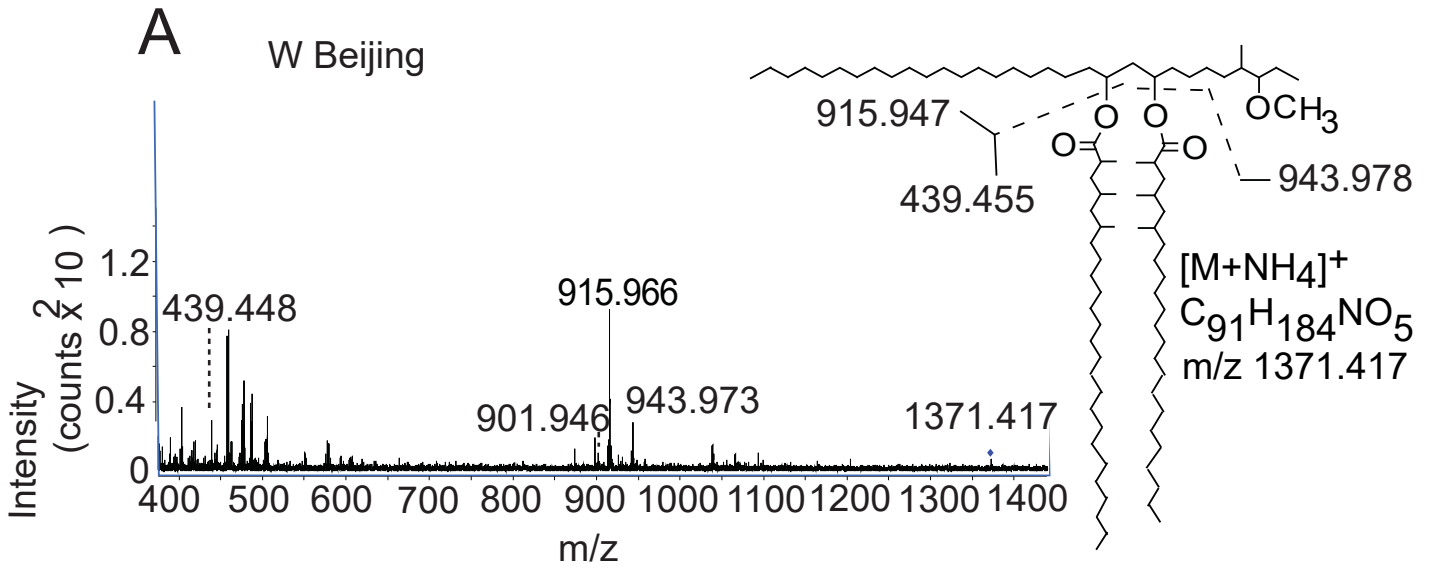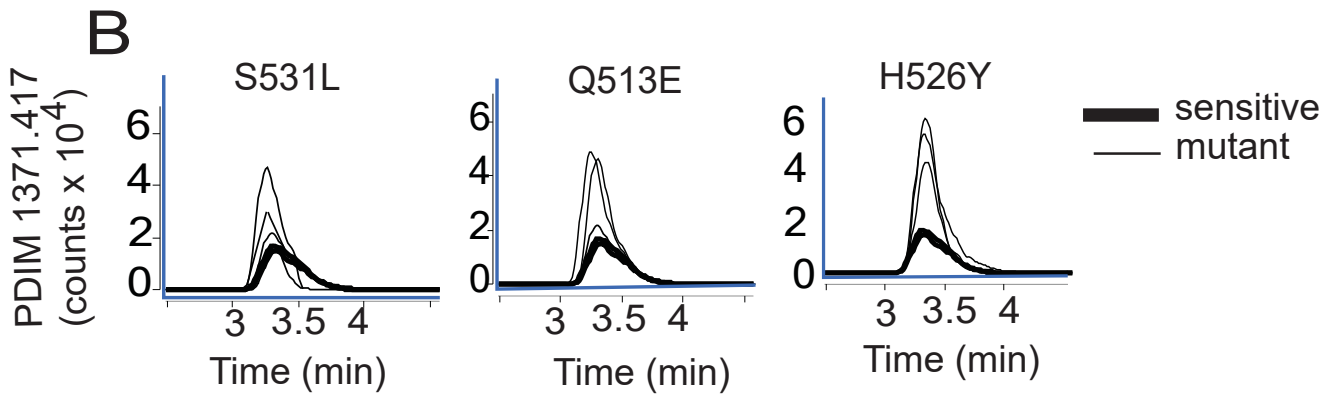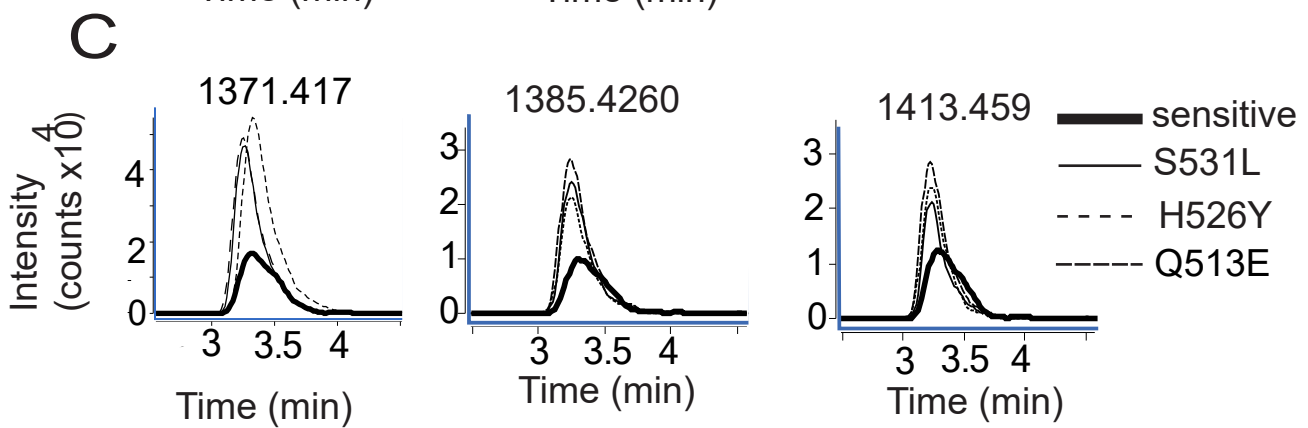

## Legends to Supplementary Figures

**SUPPLEMENTARY FIGURE 1. Globally changed events detected in the W-Beijing strain of *M. tuberculosis*.** Globally changed events are defined as those events whose intensity is altered by two-fold (corrected  $p < 0.05$ ) among all three drug resistant mutants (S531L, Q523E, H526Y) as compared to the drug sensitive parental strain, indicating fold changes. The indicated names are considered preliminary annotations that were derived by matching the measured  $m/z$  value to the MycoMass dataset. These annotations were subsequently confirmed by CID-MS. The number 1, 2, 3 in the table denote the annotation for carboxymycobactins, mycobactins and diacylated sulfoglycolipids respectively.

**SUPPLEMENTARY FIGURE 2. Globally changed events detected in the CDC1551 strain of *M. tuberculosis*.** Globally changed events are defined as those events whose intensity is altered by two-fold (corrected  $p < 0.05$ ) among all three drug resistant mutants (S531L, Q523E, H526Y) as compared to the drug sensitive parental strain, indicating fold changes. The indicated names are considered preliminary annotations that were derived by matching the measured  $m/z$  value to the MycoMass dataset. These annotations were subsequently confirmed by CID-MS. 1 and 2 in the table denote the annotation for carboxymycobactins, and mycobactins respectively.

**SUPPLEMENTARY FIGURE 3. Positive mode CID-MS of lipids of interest.** CID spectra of A. mycobactin,  $m/z$  909, B. carboxymycobactin,  $m/z$  785, and C. Ac2SGL,  $m/z$  1296, along with the corresponding chemdraw-generated structure, which support the fragmentation profiles show in Figures 3A and 4A.

**SUPPLEMENTARY FIGURE 4. Manual analysis of carboxymycobactins and mycobactins with masses that are in alkane series.** A. After total input lipids were normalized based on measured mass, they yielded similar time-intensity curves from each mutant indicating equivalent loading for lipidomics analysis. B-C. Extracted ion chromatograms of lipids from the *M. tuberculosis* strain CDC1551 (B) and W-Beijing (C) were analyzed for low abundance mycobactins ( $m/z$  values of 911 and 923) and carboxymycobactin ( $m/z$  values of 773 and 813) in alkane series.

**SUPPLEMENTARY FIGURE S5. Altered Phthiocerol dimycocerosate in rifampin resistance mutants.** A. The identify of an ion from the W-Beijing strain ( $m/z$  1371) was identified matched the reported mass of phthiocerol dimycocerosate (PIDM) detected as an ammonium adduct. CID-MS of the ion demonstrated fragments consistent with the phthiocerol backbone and the polyketide side chains. B. Triplicate ion chromatograms from the indicated W-Beijing mutant (S531L, Q513E, H526Y) compared to the drug sensitive parent showed increases in signal for PDIM in the mutants. C. EICs showing the intensities of PDIM chain length analogs ( $m/z$  1371.4, 1385.4, 1413.5) showed similar patterns of change. These results are typical of 2 or more experiments.
